# Supplementary material for: Incorporation of Tumor-Free Distance and Other Alternative Ultrasound Biomarkers into a Myometrial Invasion-Based Model Better Predicts Lymph Node Metastasis in Endometrial Cancer: Evidence and Future Prospects
Source: Diagnostics (Basel). 2022 Oct 27;12(11):2604. doi: 10.3390/diagnostics12112604 (PMC9689828; doi:10.3390/diagnostics12112604)
Supplement: Supplementary file 1 [file diagnostics-12-02604-s001.zip › Supplementary material S2_Table S1.pdf]

**Table S1.** Univariate logit models (models D'-I) and multivariate logit model (model J) for low-risk group (n=82).

| Model | Covariate    | Est.   | Std.<br>Error | p-value | AIC   | ACC   | AUC (95% CI)        | p-value<br>(LRT) |
|-------|--------------|--------|---------------|---------|-------|-------|---------------------|------------------|
| A''   | (Intercept)  | -2.71  | 0.50          | 0.000   | 46.39 | 0.768 | 0.605 (0.317–0.894) | 0.462            |
|       | SPE-VOL      | -0.01  | 0.02          | 0.422   |       |       |                     |                  |
| B''   | (Intercept)  | -2.79  | 0.55          | 0.000   | 46.34 | 0.561 | 0.480 (0.182–0.778) | 0.444            |
|       | AREA         | -0.05  | 0.06          | 0.410   |       |       |                     |                  |
| C''   | (Intercept)  | -1.15  | 0.79          | 0.145   | 43.11 | 0.683 | 0.712 (0.562–0.862) | 0.051            |
|       | uTFD         | -0.22  | 0.13          | 0.096   |       |       |                     |                  |
| D''   | (Intercept)  | -2.53  | 0.73          | 0.000   | 47.13 | 0.829 | 0.625 (0.315–0.935) | 0.284            |
|       | bs(SPE.VOL)1 | -5.90  | 8.05          | 0.463   |       |       |                     |                  |
|       | bs(SPE.VOL)2 | 31.17  | 27.0          | 0.248   |       |       |                     |                  |
|       | bs(SPE.VOL)3 | -63.13 | 66.4          | 0.342   |       |       |                     |                  |
| E''   | (Intercept)  | -1.57  | 0.81          | 0.052   | 45.25 | 0.488 | 0.737 (0.524–0.950) | 0.128            |
|       | bs(AREA)1    | -12.19 | 7.05          | 0.084   |       |       |                     |                  |
|       | bs(AREA)2    | 24.92  | 12.86         | 0.053   |       |       |                     |                  |
|       | bs(AREA)3    | -29.82 | 20.88         | 0.153   |       |       |                     |                  |
| F''   | (Intercept)  | -4.15  | 2.57          | 0.106   | 52.57 | 0.720 | 0.786 (0.626–0.947) | 0.104            |
|       | bs(uTFD)1    | 10.00  | 9.44          | 0.289   |       |       |                     |                  |
|       | bs(uTFD)2    | -12.25 | 10.95         | 0.263   |       |       |                     |                  |
|       | bs(uTFD)3    | -1.68  | 18.29         | 0.927   |       |       |                     |                  |
| G''   | (Intercept)  | -3.00  | 0.59          | 0.000   | 44.70 | 0.768 | 0.645 (0.421–0.869) | 0.135            |
|       | uMI          | 1.32   | 0.86          | 0.126   |       |       |                     |                  |
| H''   | (Intercept)  | -3.31  | 0.72          | 0.000   | 43.31 | 0.720 | 0.695 (0.483–0.908) | 0.057            |
|       | EMIR         | 1.66   | 0.90          | 0.067   |       |       |                     |                  |
| I''   | (Intercept)  | -2.47  | 0.43          | 0.000   | 46.14 | 0.134 | 0.533 (0.505–0.561) | 0.376            |
|       | uCSI         | -15.10 | 1769.26       | 0.993   |       |       |                     |                  |

|     |             |       |      |       |       |       |                     |       |
|-----|-------------|-------|------|-------|-------|-------|---------------------|-------|
| J'' | (Intercept) | -3.54 | 1.28 | 0.006 |       |       |                     |       |
|     | Size        | 0.79  | 0.92 | 0.385 | 46.24 | 0.780 | 0.575 (0.363–0.786) | 0.405 |
| K'' | (Intercept) | -3.11 | 0.59 | 0.000 |       |       |                     |       |
|     | uMI:EMIR    | 2.01  | 0.89 | 0.024 | 42.27 | 0.854 | 0.691 (0.469–0.913) | 0.031 |
